## Posters

### Clinical Quality: Improved Access to Service

#### 139 WHAT ARE THE BARRIERS AND FACILITATORS TO EFFECTIVE ADVANCE CARE PLANNING (ACP) IN RESIDENTIAL CARE SETTINGS FOR OLDER PEOPLE?

K. Chumbley  
St Helena Hospice

**Introduction:** ACP is recommended for all people approaching the end of life but there is an inequality in access to ACP for care home residents. In North East Essex there has been an Electronic Palliative Care Coordination system (EPaCCS) in place for 6 years, currently without care home staff access capability. The aim of this study was to investigate ACP within care homes within this context.

**Method:** A qualitative study, with semi-structured interviews with fourteen senior care home staff from ten care homes across North East Essex. The interview transcripts underwent thematic analysis regarding facilitators and inhibitors to effective ACP.

**Results:** Four overarching themes were identified. These were relationships, communication, healthcare systems and attitudes. Care home staff considered ACP to be part of their role but perceived their work in this area to be separate from that performed by other health care professionals. The care home staff awareness of ACP done by other health care professionals was limited. Care home staff were aware of the EPaCCS, but only a minority perceived it to impact on residents care. All interviewees were keen to have access to the EPaCCS. Many of the facilitators and barriers to effective ACP in this locality are consistent with those found in prior literature. Having an EPaCCS within the area did not alleviate a perceived barrier of poor communication. Relationships between staff, residents, families and health care professionals remain the most common facilitators to ACP, with continuity of care from primary care, specialist palliative care and paperwork tools remaining important.

**Conclusion:** To overcome the inequity of access to ACP for residents in care homes interventions could be commissioned to address current barriers. These could include communication skills training, aligned primary care and community services as well as technological support for communication with family and access to EPaCCS.
